# Supplementary material for: Lysophosphatidic acid promotes colitis-associated intestinal fibrosis by suppressing autophagy via LPAR3/ AMPK/mTOR pathway
Source: Research Square preprint supplement (doi:10.21203/rs.3.rs-7509054/v1), 2025-11-02
Supplement: Supplementary file 1 [file 70eaf664e0dce0618e29a556.docx]

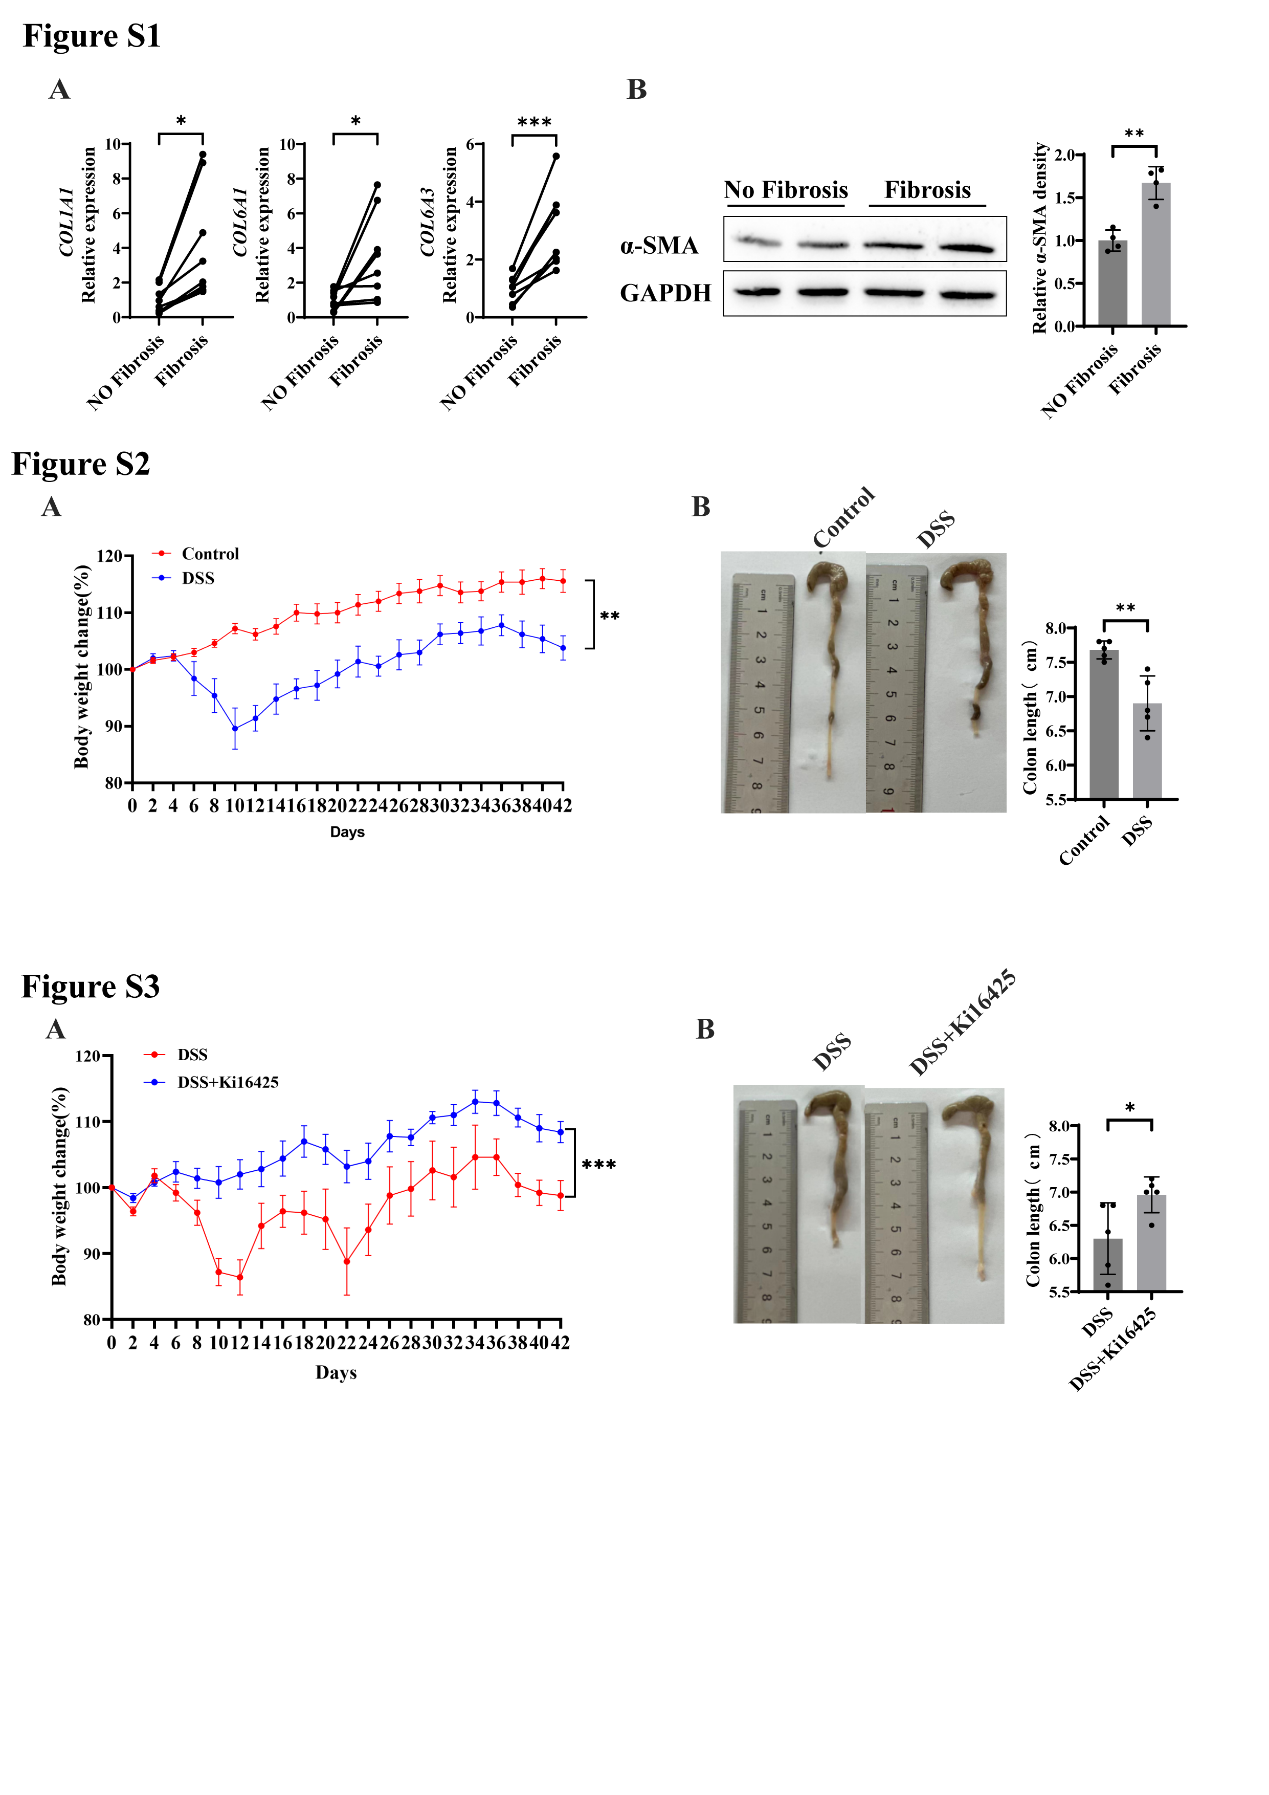


**Supplementary Figure 1**. **Evaluation of intestinal fibrosis of patients with CD.** Surgical intestinal tissues were taken from nonfibrotic and fibrotic sites from CD patients with intestinal fibrosis [n=8]. [A] Levels of *COL1A1、COL6A1 and COL6A3* in colonic tissues were measured by qRT-PCR. [B] Expressions of α-SMA were detected by Western blot. **P* < 0.05, ***P* < 0.01, ****P* < 0.001.


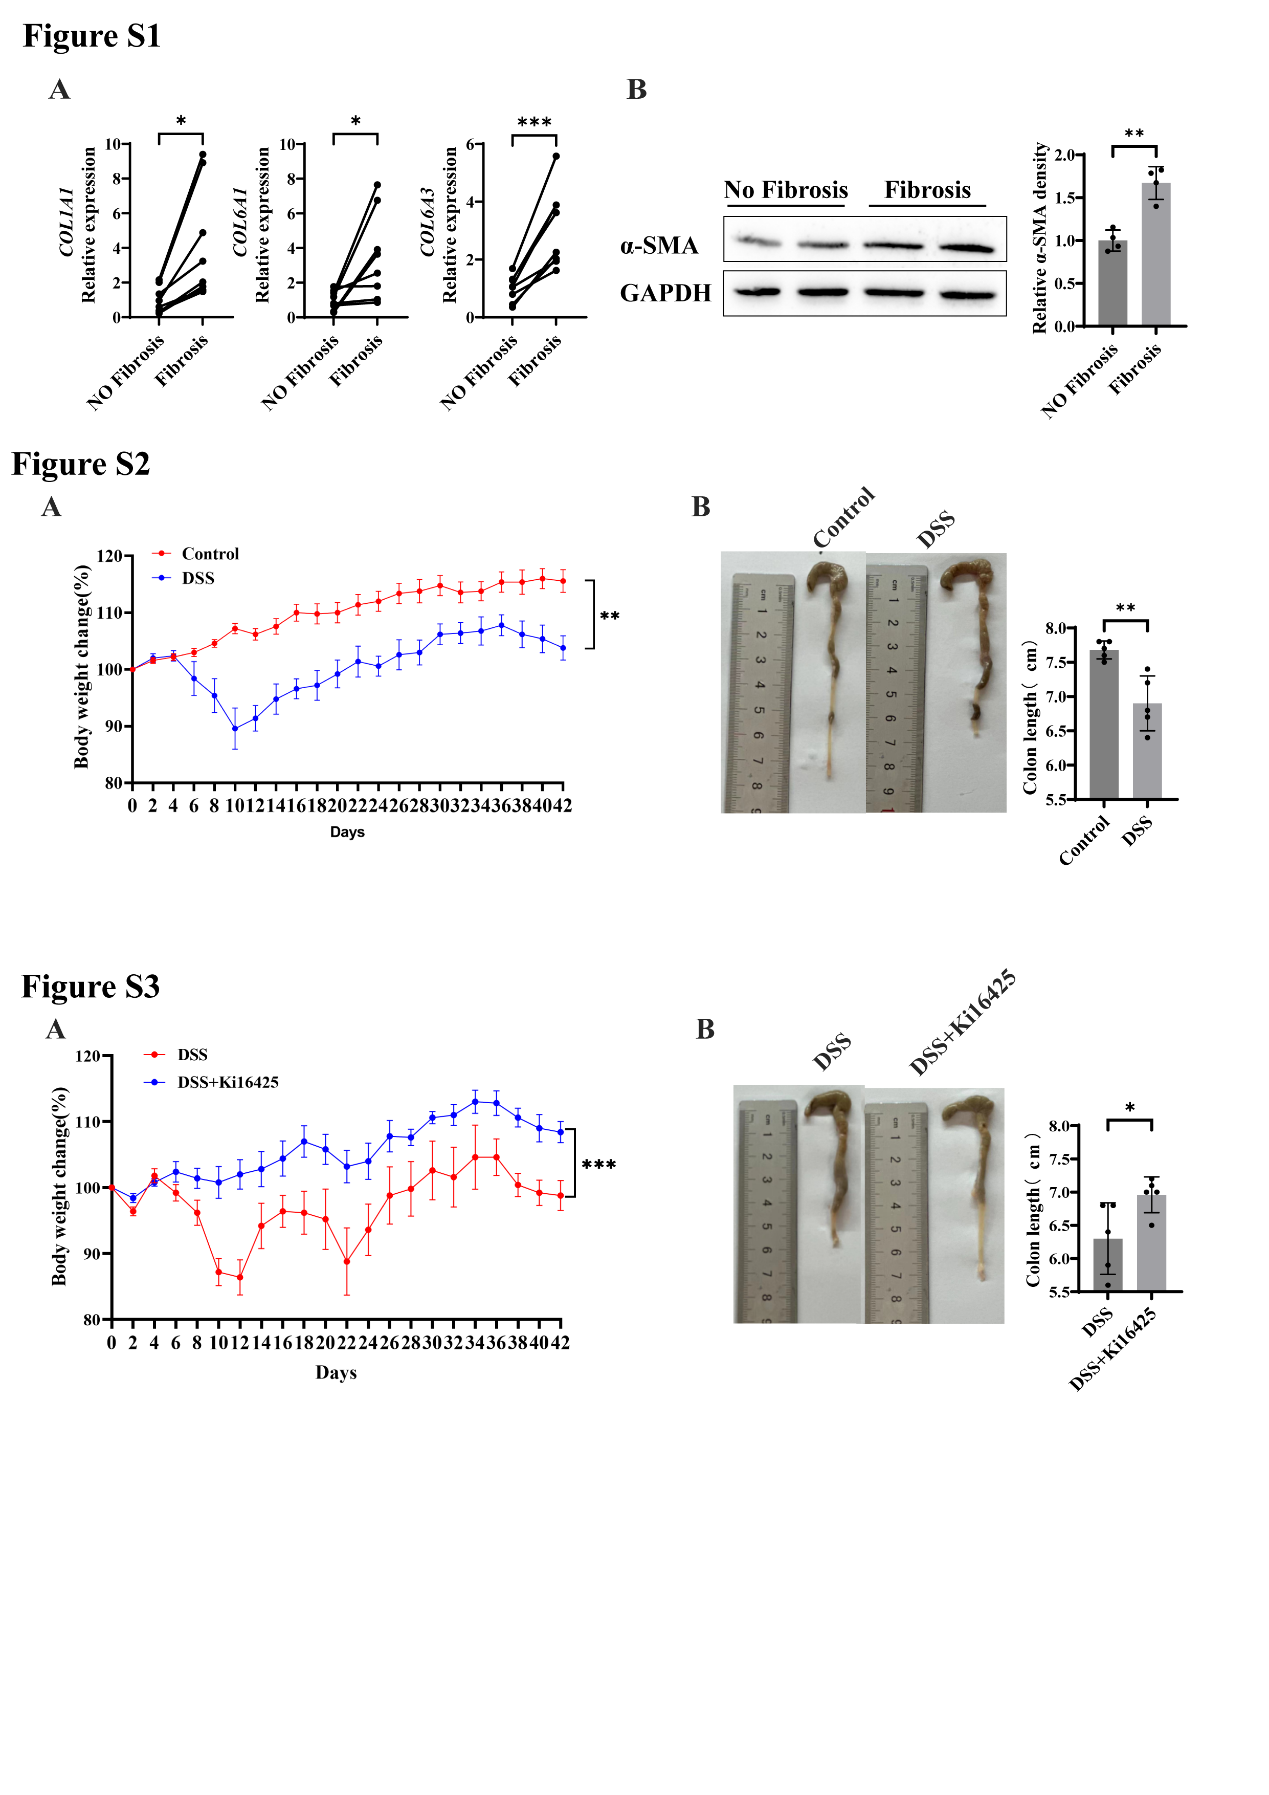


**Supplementary Figure 2**. **DSS-induced chronic colitis model in C57BL/6J mice.** Mice (n=5/group) received three cycles of 1.5% DSS treatment (7 days DSS + 7 days water recovery per cycle) and were sacrificed on day 42. [A] Longitudinal monitoring of body weight changes (%) throughout the experimental timeline. [B] Macroscopic evaluation of colon morphology and quantification of colon shortening. **P* < 0.05, ***P* < 0.01,****P* < 0.001


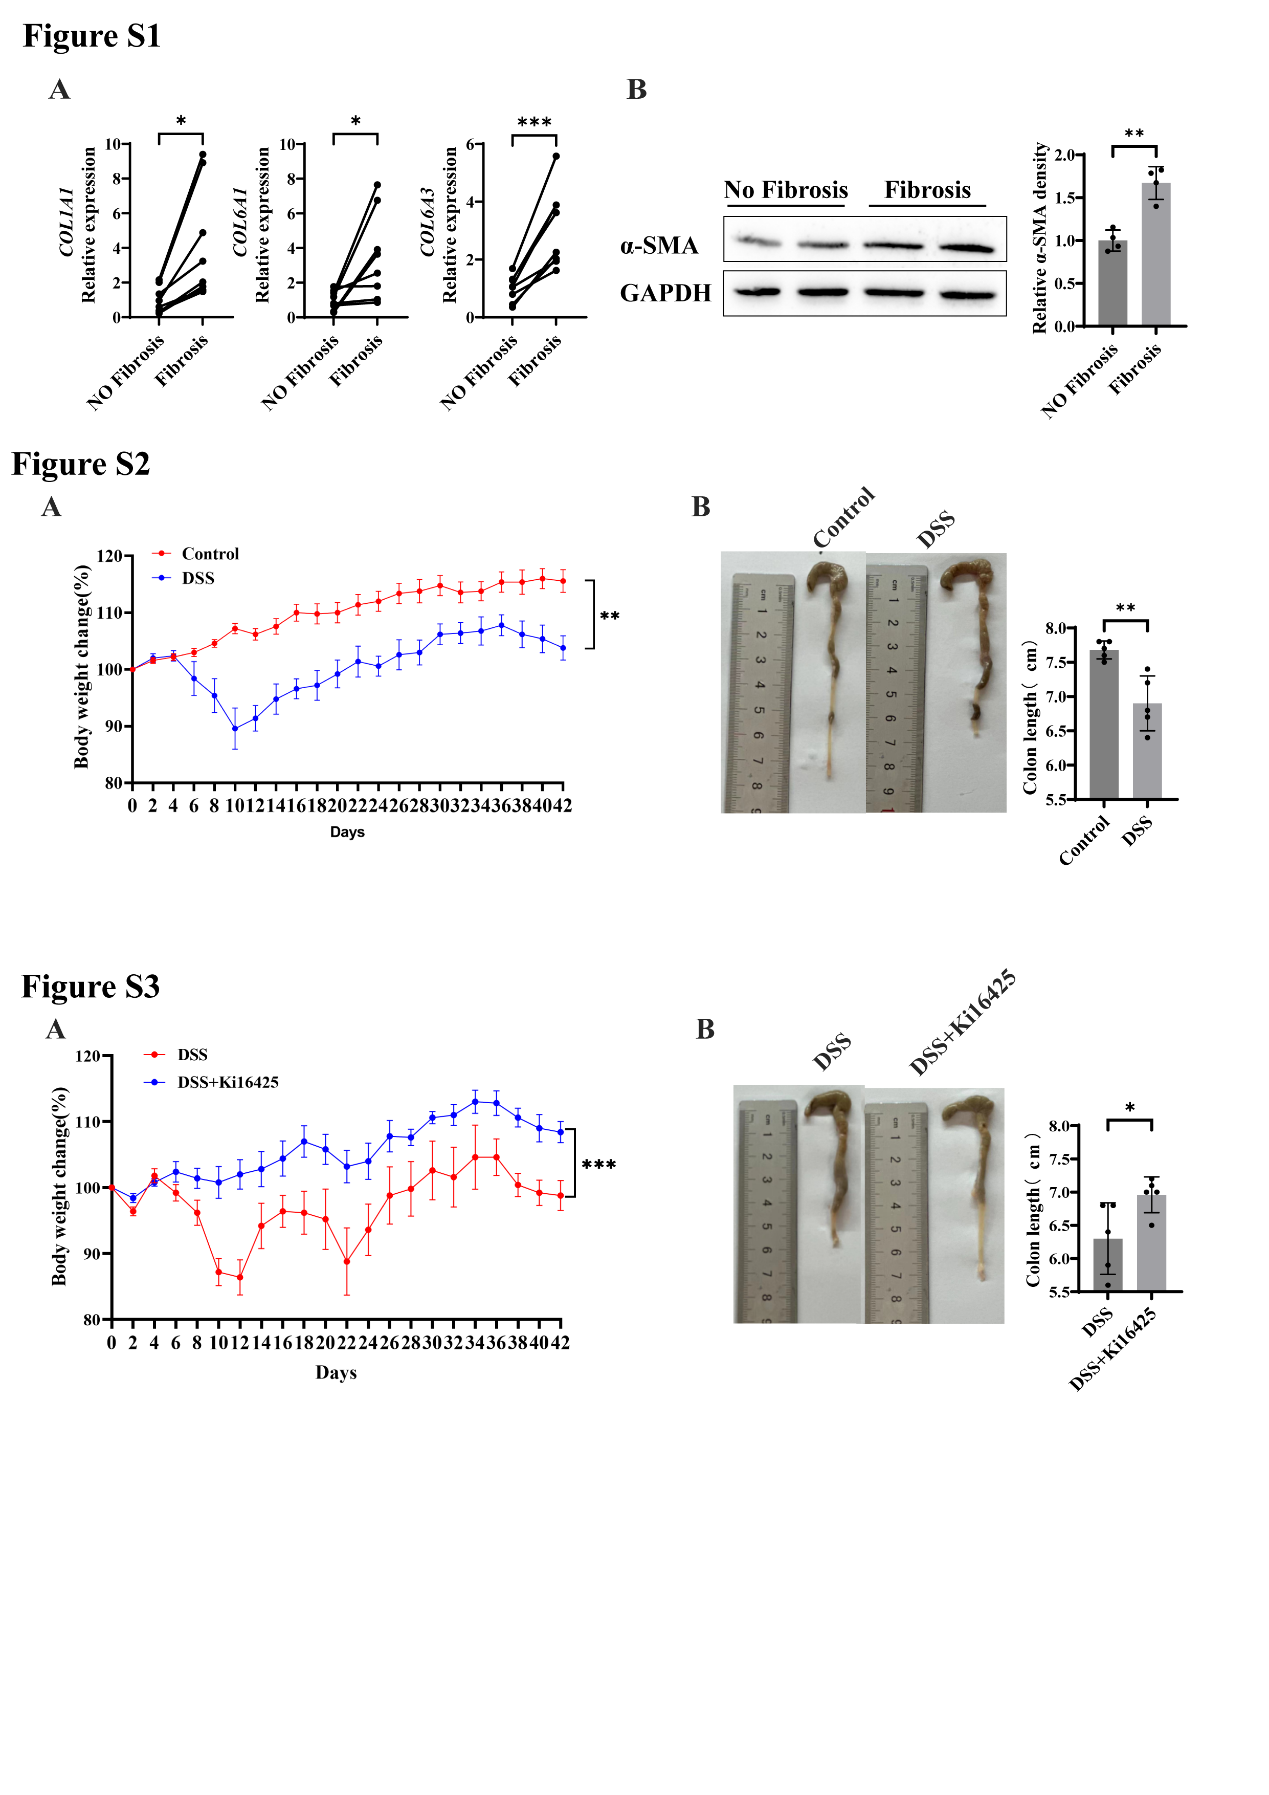


**Supplementary Figure 3. LPAR3 inhibition attenuates LPA-exacerbated intestinal inflammation in DSS-induced colitis**. C57BL/6J mice (n=5 per group) were subjected to three cycles of colitis induction, each consisting of 7 days of 1.5% (w/v) DSS in drinking water followed by 7 days of regular water recovery, with concurrent intraperitoneal administration of the LPAR3 inhibitor Ki16425 (10 mg/kg) throughout the DSS treatment periods, and all mice were humanely euthanized for tissue collection on day 42. [A] Body weight dynamics (% change from baseline) during cyclic DSS administration with or without LPAR3 antagonist treatment. [B] Macroscopic evaluation of colon morphology and quantitative analysis of colon shortening. **P* < 0.05, ***P* < 0.01, ****P* < 0.001

Supplemental table 1. The primers used in qRT-PCR

| Gene | Primer sequence |
| --- | --- |
| COL1A1(human) | forward:5’-GAGGGCCAAGACGAAGACATC-3’ |
|  | reverse: 5’-CAGATCACGTCATCGCACAAC-3’ |
| COL6A1(human) | forward: 5’-ACAGTGACGAGGTGGAGATCA-3’ |
|  | reverse: 5’-GATAGCGCAGTCGGTGTAGG-3’ |
| COL6A3(human) | forward: 5’-ATGAGGAAACATCGGCACTTG-3’ |
|  | reverse: 5’-GGGCATGAGTTGTAGGAAAGC-3’ |
| ACTA2(human) | forward: 5’-AAAAGACAGCTACGTGGGTGA-3’ |
|  | reverse: 5’-GCCATGTTCTATCGGGTACTTC-3’ |
| GAPDH(human) | forward:5’-GGAGCGAGATCCCTCCAAAAT-3’ |
|  | reverse:5’-GGAGCGAGATCCCTCCAAAAT-3’ |
| IL-1β(mouse) | forward: 5’-GAAATGCCACCTTTTGACAGTG-3’ |
|  | reverse: 5’-TGGATGCTCTCATCAGGACAG-3’ |
| IL-6(mouse) | forward: 5’-CTGCAAGAGACTTCCATCCAG-3’ |
|  | reverse: 5’-AGTGGTATAGACAGGTCTGTTGG-3’ |
| TNF-α(mouse) | forward: 5’-CTGAACTTCGGGGTGATCGGC-3’ |
|  | reverse: 5’-GGCTTGTCACTCGAATTTTGAGA-3’ |
| Col1a1(mouse) | forward: 5’-GCTCCTCTTAGGGGCCACT-3’ |
|  | reverse: 5’-ATTGGGGACCCTTAGGCCAT-3’ |
| Col6a1(mouse) | forward: 5’-CTGCTGCTACAAGCCTGCT-3’ |
|  | reverse: 5’-GCACGAAGAATAGATCCACAGGG-3’ |
| Col6a3(mouse) | forward: 5’-GCTGCGGAATCACTTTGTGC-3’ |
|  | reverse: 5’-CACCTTGACACCTTTCTGGGT-3’ |
| Gapdh(mouse) | forward: 5’-AGGTCGGTGTGAACGGATTTG-3’ |
|  | reverse: 5’-GGGGTCGTTGATGGCAACA-3’ |
| LPAR1(human) | forward: 5’- GCTGCCATCTCTACTTCCATC-3’ |
|  | reverse: 5’-AAGCGGCGGTTGACATAGAT |
| LPAR2(human) | forward: 5’-ACAGCCCGACTTTCACTTGAG-3’ |
|  | reverse: 5’-GCCCACAATGAGCATGACCA-3’ |
| LPAR3(human) | forward: 5’-GCTGCCGATTTCTTCGCTG-3’ |
|  | reverse: 5’-AGCAGTCAAGCTACTGTCCAG-3’ |
| LPAR4(human) | forward: 5’- TCCTTACCAACATCTATGGGAGC-3’ |
|  | reverse:5’-ACGTTTGGAGAAGCCTTCAAAG-3’ |
